# Supplementary material for: Single-cell transcriptome profiling reveals vascular endothelial cell heterogeneity in human skin
Source: PubMed Central journal article supplement (PMC8120211; doi:10.7150/thno.54917), 2021-04-19
Supplement: thnov11p6461s1.pdf [file thnov11p6461s1.pdf]

## Supplementary figures and legends

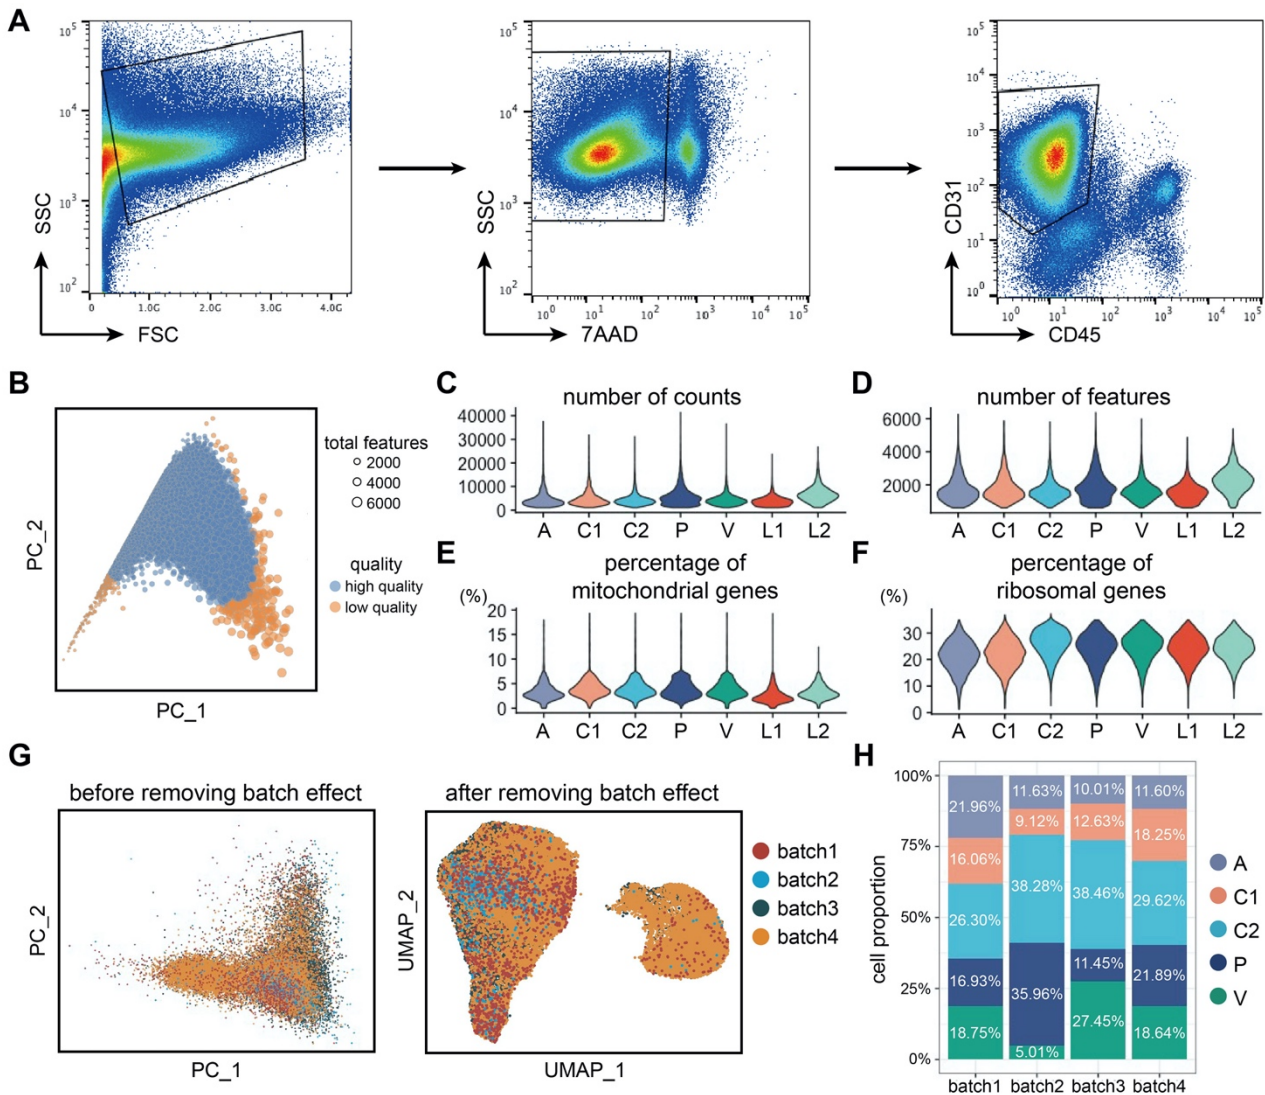

**Figure S1. Endothelial cell sorting, quality control, and data integration.**

(A) Gating logic to sort live  $CD31^+$   $CD45^-$  cells via flow cytometry. (B) PCA plot showing high-quality cells (blue) and low-quality cells (orange). Each circle represents a cell. Circle size indicate total features in the cell. (C-F) Violin plots showing the numbers of counts and features, percentages of mitochondrial and ribosomal genes after quality control. (G) PCA and UMAP plot of cells before and after batch effect removing, respectively. Cells are colored by batch. (H) Cell composition of each dermal EC cluster in four batches.

Cluster A: arteriole ECs; Cluster C1, C2: capillary ECs; Cluster P: post-capillary ECs; Cluster V: venule ECs; Cluster L1, L2: lymphatic endothelial cells.

PCA: principal component analysis; UMAP: uniform manifold approximation and projection.

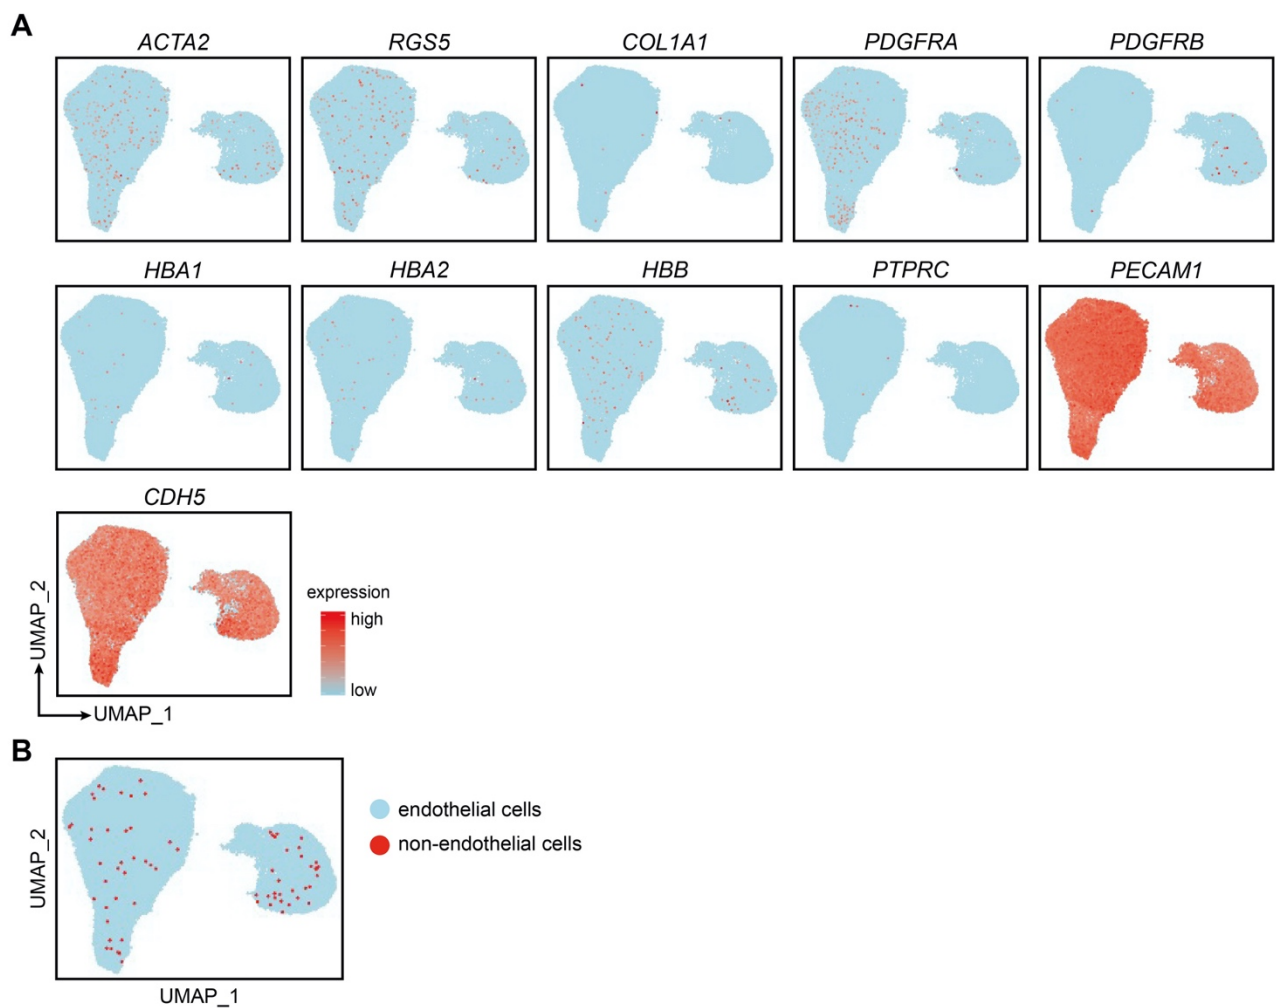

**Figure S2. Distinguishing and filtering out non-endothelial cells.**

(A) Expressions of markers of smooth muscle cells (*ACTA2*, *RGS5*), fibroblasts (*COL1A1*), pericytes (*PDGFRA*, *PDGFRB*), red blood cells (*HBA1*, *HBA2*, *HBB*), immune cells (*PTPRC*), and endothelial cells (*PECAM1*, *CDH5*) in single cell data. (B) UMAP plot showing endothelial cells and non-endothelial cells.

UMAP: uniform manifold approximation and projection.

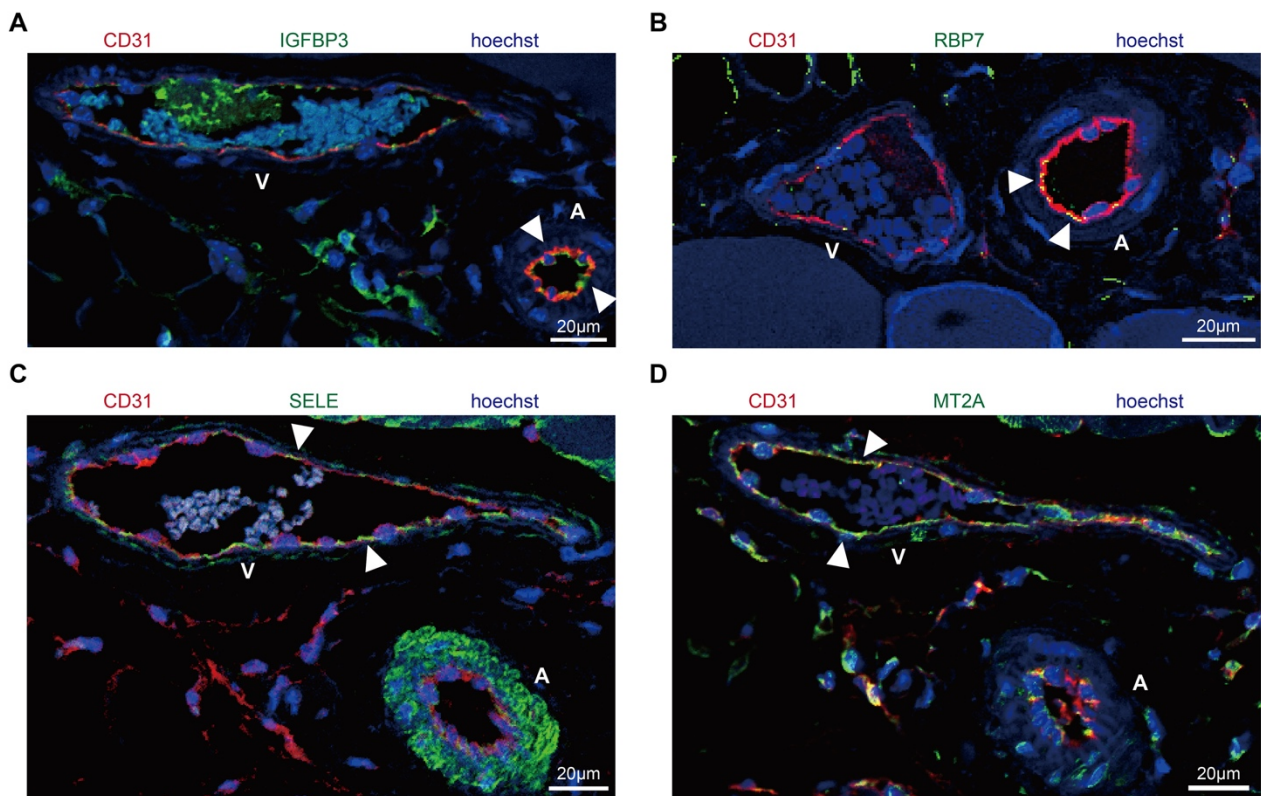

**Figure S3. Validation of potential arteriovenous markers in femoral artery and vein.**

(A-D) Immunofluorescence of IGFBP3, RBP7, SELE, MT2A, and CD31 in murine femoral artery and vein. A stands for artery, and V stands for vein. Original magnification 200×; scale bar: 20 μm; n = 3. White arrowheads point out positive co-staining of marker genes and CD31.



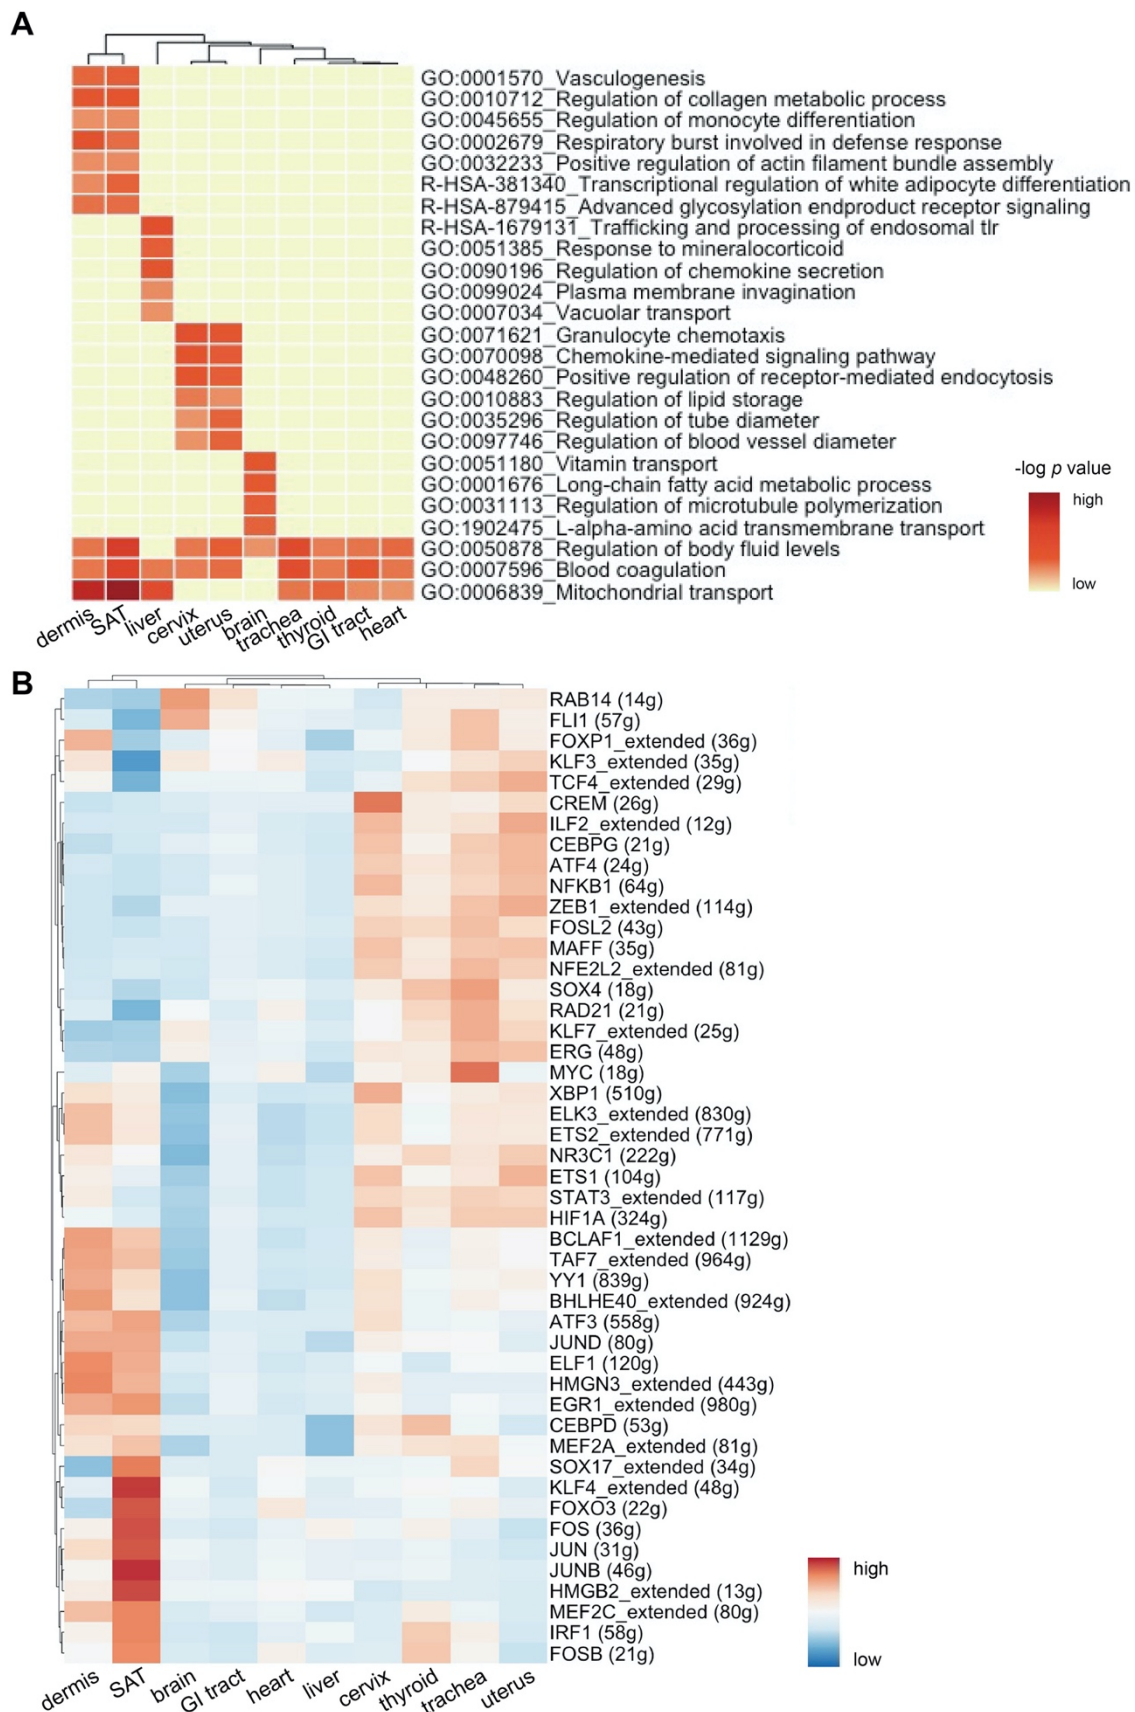

**Figure S4. Pathways and transcriptional factors enriched in ECs from 10 different tissues/organs.**

(A) Heatmap of the enriched GO pathways in ECs from 10 different tissues/organs. the color represents the  $-\log p$  value. (B) Heatmap of the single-cell regulatory network inference and clustering in ECs from different tissues/organs. Numbers in brackets indicate the regulons for transcription factors.

ECs: vascular endothelial cells; GI: gastrointestinal; GO: gene ontology; SAT: subcutaneous adipose tissue.

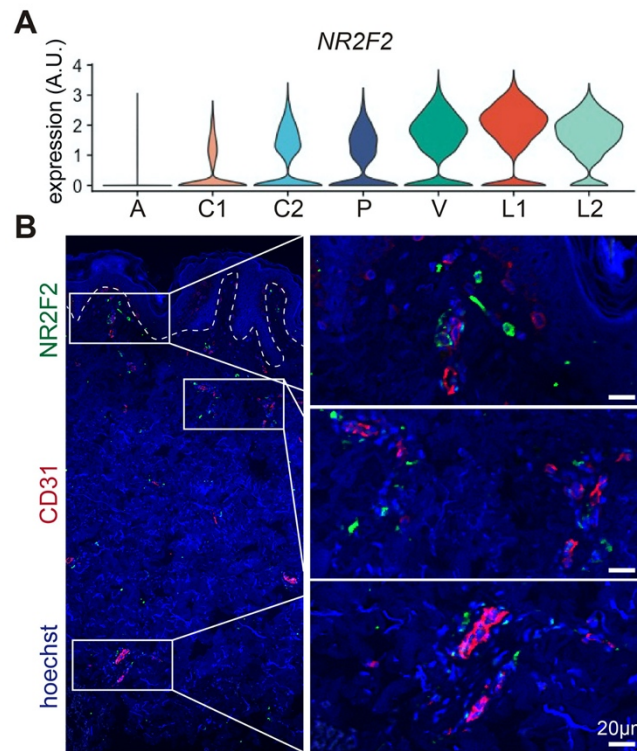

**Figure S5. Expressions of *NR2F2* in dermal endothelial cells at mRNA and protein levels.**

(A) mRNA levels of *NR2F2* in dermal endothelial cell clusters in single-cell RNA sequencing data.

(B) Protein levels of *NR2F2* in dermal vasculature via tissue immunofluorescence. Images of  $CD31^+$  ECs in the superficial, intermediate, and deep plexus are zoomed in. The image is representative of 3 biological replicates. The white dotted line marks the interface between epidermis and dermis. Scale bars represent 20  $\mu$ m.

Cluster A: arteriole ECs; Cluster C1, C2: capillary ECs; Cluster P: post-capillary ECs; Cluster V: venule ECs.

A.U.: arbitrary unit.

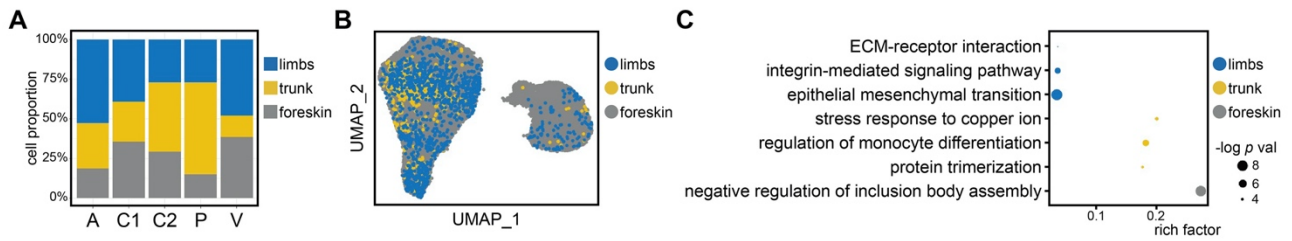

**Figure S6. Composition of dermal ECs derived from different anatomical locations.**

(A) The cell proportions of dermal ECs from different anatomical locations in each dermal EC cluster.

(B) UMAP plot of dermal endothelial cells colored by anatomical location. (C) Pathway analysis of

DEGs of dermal ECs derived from limbs, trunk, and foreskin. y axis represents the rich factor. The circle size represents the  $-\log p$  value, and the color represents the anatomical location.

Cluster A: arteriole ECs; Cluster C1, C2: capillary ECs; Cluster P: post-capillary ECs; Cluster V: venule ECs.

DEGs: differentially expressed genes; ECs: vascular endothelial cells; UMAP: uniform manifold approximation and projection.

## Supplementary tables

**Table S1. Genes for measuring antigen-presenting score.**

---

Genes:

GO\_ANTIGEN\_PROCESSING\_AND\_PRESENTATION\_OF\_PEPTIDE\_OR\_POLYSACCHARIDE\_ANTIGEN\_VIA\_MHC\_CLASS\_II

---

*AC027237.1*

*ACTR10*

*ACTR1A*

*ACTR1B*

*APIB1*

*APIG1*

*AP1M1*

*AP1M2*

*AP1S1*

*AP1S2*

*AP1S3*

*AP2A1*

*AP2A2*

*AP2B1*

*AP2M1*

*AP2S1*

*ARF1*

*CANX*

*CAPZA1*

*CAPZA2*

*CAPZA3*

*CAPZB*

*CD74*

*CENPE*

*CLTA*

*CLTC*

*CTSD*

*CTSE*

*CTSF*

*CTSL*

*CTSS*

*CTSV*

*DCTN1*

*DCTN2*

*DCTN3*

*DCTN4*

*DCTN5*

*DCTN6*



*DNM2*  
*DYNC1H1*  
*DYNC1H1*  
*DYNC1I2*  
*DYNC1LI1*  
*DYNC1LI2*  
*DYNLL1*  
*DYNLL2*  
*FCER1G*  
*FCGR2B*  
*HLA-DMA*  
*HLA-DMB*  
*HLA-DOA*  
*HLA-DOB*  
*HLA-DPA1*  
*HLA-DPB1*  
*HLA-DQA1*  
*HLA-DQA2*  
*HLA-DQB1*  
*HLA-DQB2*  
*HLA-DRA*  
*HLA-DRB1*  
*HLA-DRB3*  
*HLA-DRB4*  
*HLA-DRB5*  
*IFI30*  
*KIF11*  
*KIF15*  
*KIF18A*  
*KIF22*  
*KIF26A*  
*KIF2A*  
*KIF2B*  
*KIF2C*  
*KIF3A*  
*KIF3B*  
*KIF3C*  
*KIF4A*  
*KIF4B*  
*KIF5A*  
*KIFAP3*  
*KLC1*  
*KLC2*  
*LAG3*  
*LGMN*

*MARCH1*  
*OSBPL1A*  
*PYCARD*  
*RAB7A*  
*RACGAP1*  
*RILP*  
*SAR1B*  
*SEC13*  
*SEC23A*  
*SEC24A*  
*SEC24B*  
*SEC24C*  
*SEC24D*  
*SEC31A*  
*SH3GL2*  
*SPTBN2*  
*THBS1*  
*TRAF6*  
*TREM2*

---

**Table S2. Genes for measuring adhesion score.**

---

Genes:

---

GO\_LEUKOCYTE\_ADHESION\_TO\_VASCULAR\_ENDOTHELIAL\_CELL

---

*ADD2*  
*CCL21*  
*CCL25*  
*CCL28*  
*CCR2*  
*CX3CR1*  
*CXCL12*  
*ELANE*  
*ETS1*  
*GCNT1*  
*GOLPH3*  
*ICAM1*  
*IRAK1*  
*ITGA4*  
*ITGB1*  
*ITGB7*  
*KLF4*  
*LEP*  
*MADCAM1*  
*MIR141*  
*MIR146A*  
*MIR155*  
*MIR21*  
*MIR221*  
*MIR222*  
*MIR31*  
*MIR92A1*  
*MIR92A2*  
*MIRLET7G*  
*NFAT5*  
*PODXL2*  
*PTAFR*  
*RELA*  
*RHOA*  
*ROCK1*  
*SELE*  
*SELL*  
*SELP*  
*SELPLG*  
*SPN*  
*TNF*

*TRAF6*  
*VCAMI*

---

**Table S3. Clinical information of skin donors for scRNAseq.**

| Donor            | Age | Gender | Tissue site       | Surgery                   | Batch      |
|------------------|-----|--------|-------------------|---------------------------|------------|
| Healthy donor 1  | 18  | male   | limbs (forearm)   | nevus removal             | batch 1    |
| Healthy donor 2  | 25  | female | limbs (upper arm) | nevus removal             | batch 1    |
| Healthy donor 3  | 20  | female | limbs (upper arm) | nevus removal             | batch 1    |
| Healthy donor 4  | 32  | male   | limbs (forearm)   | nevus removal             | batch 1    |
| Healthy donor 5  | 38  | male   | limbs (upper arm) | skin flap transplantation | batch 1    |
| Healthy donor 6  | 25  | female | trunk (back)      | nevus removal             | batch 2    |
| Healthy donor 7  | 45  | female | trunk (breast)    | reduction mammoplasty     | batch 2    |
| Healthy donor 8  | 23  | male   | foreskin          | circumcision              | batch 3, 4 |
| Healthy donor 9  | 27  | male   | foreskin          | circumcision              | batch 3, 4 |
| Healthy donor 10 | 28  | male   | foreskin          | circumcision              | batch 3, 4 |

**Table S4. Clinical information of skin donors for immunofluorescence.**

| Donor            | Age | Gender | Tissue site       | Surgery                   |
|------------------|-----|--------|-------------------|---------------------------|
| Healthy donor 1  | 33  | male   | limbs (forearm)   | nevus removal             |
| Healthy donor 2  | 24  | female | limbs (thigh)     | plastic surgery           |
| Healthy donor 3  | 30  | female | trunk (breast)    | reduction mammoplasty     |
| Healthy donor 4  | 31  | male   | trunk (abdominal) | skin flap transplantation |
| Healthy donor 5  | 43  | female | trunk (breast)    | reduction mammoplasty     |
| Healthy donor 6  | 37  | female | limbs (upper arm) | skin flap transplantation |
| Healthy donor 7  | 25  | femal  | trunk (back)      | nevus removal             |
| Healthy donor 8  | 29  | male   | limbs (upper arm) | skin flap transplantation |
| Healthy donor 9  | 20  | male   | foreskin          | circumcision              |
| Healthy donor 10 | 22  | male   | foreskin          | circumcision              |
| Healthy donor 11 | 27  | male   | foreskin          | circumcision              |
